# Supplementary material for: Cottonseed extract as a coagulant for water treatment
Source: Royal Society of Chemistry journal article supplement (doi:10.1039/d2va00205a), 2022-11-29
Supplement: d2va00205a1.pdf [file d2va00205a1.pdf]

## Cottonseed extract as a coagulant for water treatment

Mekayla DePaolis<sup>1</sup>, Sophie De Respino<sup>1</sup>, Laxmicharan Samineni<sup>2</sup>, Scott Brighton<sup>1</sup>, Manish Kumar<sup>1,\*</sup>

<sup>1</sup>Department of Civil, Architectural and Environmental Engineering, University of Texas at Austin, Austin, Texas, 78712, United States

<sup>2</sup>Department of Chemical Engineering, University of Texas at Austin, Austin, Texas 78712, United States

\*Corresponding author e-mail: manish.kumar@utexas.edu

### Supporting Information

**Table S1:** Characteristics of untreated water used in jar tests

| Characteristic          | Concentration |
|-------------------------|---------------|
| Total Hardness (mg/L)   | 120           |
| Total Chlorine (mg/L)   | 1             |
| Free Chlorine (mg/L)    | 0.5           |
| Bromine (mg/L)          | 1             |
| Total Alkalinity (mg/L) | 120           |
| pH                      | 8.125         |
| TDS (mg/L)              | 259.5         |
| DOC (mg/L)              | 3.0           |

**Table S2:** Characteristics of groundwater\*

| Characteristic   | Concentration |
|------------------|---------------|
| Manganese (mg/L) | 0.004         |
| Iron (mg/L)      | 0.1           |
| Magnesium (mg/L) | 28            |
| Calcium (mg/L)   | 66            |
| pH               | 8.50          |
| TOC (mg/L)       | 1.6           |

\*Groundwater and characteristics provided by University of Illinois Urbana-Champaign.

**Sludge generation.** Jar tests were carried out at an initial turbidity of  $94.4 \pm 1.1$  NTU to determine the amount of sludge generation for cottonseed serum and ferric. Following sedimentation, the supernatant was removed and the sludge was filtered through a  $0.45 \mu\text{m}$

PVDF filter and dried at 60°C for 3 hours. The filter mass difference pre- and post-filtration was measured to determine the amount of sludge generated for each jar (200 mL), shown in Figure S1.

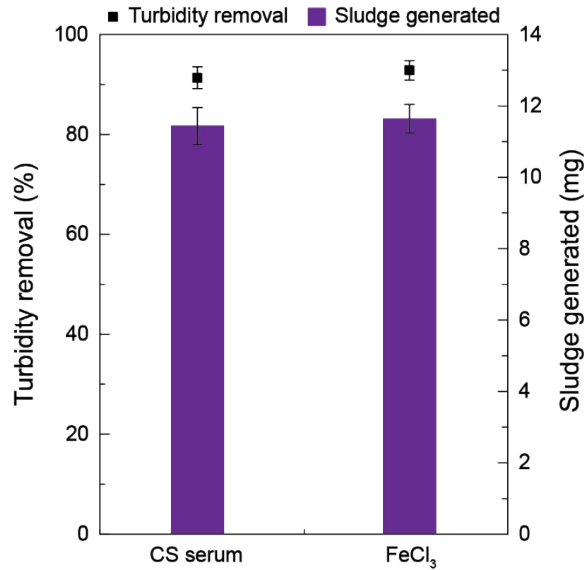

**Figure S1:** Cottonseed serum (CS serum) and FeCl<sub>3</sub> (5 mg/L dose) achieve 90% turbidity removal while generating the same amount of sludge

**Table S3:** Overview of initial jar test parameters

| Experiment                                  | Coagulant used                         | Cottonseed volume (mL) | Protein dose (mg/L) | Carbohydrate dose (mg/L) | Initial Turbidity (NTU) | Reference Figure |
|---------------------------------------------|----------------------------------------|------------------------|---------------------|--------------------------|-------------------------|------------------|
| <b>Increasing serum volume/protein dose</b> | Cottonseed serum                       | 0-10                   | 0-3.83              | Not measured             | 112±22                  | 1A               |
| <b>Increasing initial turbidity</b>         |                                        | 3                      | 1.238               |                          | 62.5-717                | 1B               |
| <b>Varying initial pH</b>                   | Cottonseed serum and FeCl <sub>3</sub> | 3                      | 1.238               |                          | 86.5±21.9               | 1C               |
| <b>Increasing serum age</b>                 | Cottonseed serum                       | 3                      | 0.7-1.34            | 108±7.3                  | 2A                      |                  |
| <b>Evaluating DOC</b>                       | Cottonseed serum and FeCl <sub>3</sub> | 3                      | 1.06±0.23           | 112.3±23.3               | 2B                      |                  |
| <b>Carbohydrate isolate coagulation</b>     | Cottonseed serum carbohydrate          | 3                      | 0.12±0.4            | 68.4±3.8                 | 3A/B                    |                  |

isolate

|                                    |                                  |   |          |          |          |      |
|------------------------------------|----------------------------------|---|----------|----------|----------|------|
| <b>Protein isolate coagulation</b> | Cottonseed serum protein isolate | 3 | 1.49±.51 | 8.97±.29 | 69.8±4.2 | 3A/B |
|------------------------------------|----------------------------------|---|----------|----------|----------|------|

**Table S4:** Final jar test water quality

| Experiment                                  | Coagulant used       | Cottonseed volume (mL) | Protein dose (mg/L) | Initial Turbidity (NTU) | Final Turbidity (NTU)      | Reference Figure |
|---------------------------------------------|----------------------|------------------------|---------------------|-------------------------|----------------------------|------------------|
| <b>Increasing serum volume/protein dose</b> | Cottonseed serum     | 0                      | 0                   | 112±22                  | 94.9±11.2                  | 1A               |
|                                             |                      | 2                      | 0.77                |                         | 17.0±7.66                  |                  |
|                                             |                      | 4                      | 1.53                |                         | 12.1±4.55                  |                  |
|                                             |                      | 6                      | 2.30                |                         | 10.4±5.47                  |                  |
|                                             |                      | 8                      | 3.07                |                         | 8.4±2.59                   |                  |
|                                             |                      | 10                     | 3.83                |                         | 8.0±4.55                   |                  |
| <b>Increasing initial turbidity</b>         | Cottonseed serum     | 3                      | 1.238               | 62.5±0.8                | 4.2±1.52                   | 1B               |
|                                             |                      |                        |                     | 133±1.0                 | 0.36±0.34                  |                  |
|                                             |                      |                        |                     | 193±6.3                 | 16.13±0.43                 |                  |
|                                             |                      |                        |                     | 302±9.4                 | 22.2±1.1                   |                  |
|                                             |                      |                        |                     | 405±14.4                | 23.73±1.58                 |                  |
|                                             |                      |                        |                     | 516±4.9                 | 32.05±1.6                  |                  |
| 591±6.9                                     | 38.2±2.0             |                        |                     |                         |                            |                  |
| <b>Varying initial pH</b>                   | Cottonseed serum     | 3                      | 1.238               | 72.9±4.8 (pH 6)         | 72.9±4.8 (pH 6)            | 1C               |
|                                             |                      |                        |                     | 21.1±4.6 (pH 7)         | 21.1±4.6 (pH 7)            |                  |
|                                             |                      |                        |                     | 13.1±2.1 (pH 8)         | 13.1±2.1 (pH 8)            |                  |
|                                             | FeCl <sub>3</sub>    | 0                      | 0                   | 111.6±7.1 (pH 8)        | 8.51±0.7 (pH 8.5)          | 1C               |
|                                             |                      |                        |                     | 98.6±1.4 (pH 8.5)       | 5.88±0.1 (pH 6)            |                  |
|                                             |                      |                        |                     |                         | 4.78±0.3 (pH 7)            |                  |
| <b>Increasing serum age</b>                 | Cottonseed serum     | 3                      | 0.7-1.34            | 108±7.3                 | 7.33 (2 d)                 | 2A               |
|                                             |                      |                        |                     |                         | 6.78 (35 d)                |                  |
|                                             |                      |                        |                     |                         | 9.07 (118 d)               |                  |
|                                             |                      |                        |                     |                         | 9.72 (218 d)               |                  |
| <b>Evaluating DOC</b>                       | Cottonseed serum and | 3                      | 1.238               | 112.3±23.3              | 5.18±0.6 (CS)<br>3.59±0.06 | 2B               |

|                                         | FeCl <sub>3</sub>                     |   |          | (FeCl <sub>3</sub> ) |           |      |
|-----------------------------------------|---------------------------------------|---|----------|----------------------|-----------|------|
| <b>Carbohydrate isolate coagulation</b> | Cottonseed serum carbohydrate isolate | 3 | 0.12±0.4 | 69.8±4.2             | 64.23±3.9 | 3A/B |
| <b>Protein isolate coagulation</b>      | Cottonseed serum protein isolate      | 3 | 1.49±.51 | 69.8±4.2             | 9.7±1.35  | 3A/B |

**Table S5:** A review of bio-coagulants based on work done by *Kurniawan et al.*<sup>1</sup>

| Bio-coagulant                                                  | Destabilization mechanism                     | Performance                                                                                                     | Reference     |
|----------------------------------------------------------------|-----------------------------------------------|-----------------------------------------------------------------------------------------------------------------|---------------|
| Crab shell                                                     | Cationic chitosan                             | 16% turbidity removal at 1 mg/L dose (pH 8.1)                                                                   | <sup>2</sup>  |
| Crab shell                                                     | Cationic chitosan                             | 94% turbidity removal at 2 mg/L dose (pH 7)                                                                     | <sup>3</sup>  |
| Shrimp shell                                                   | Cationic chitosan                             | 96% oil removal (pH 4)                                                                                          | <sup>4</sup>  |
| <i>Achatinoidea</i> shell                                      | Unidentified protein(s)                       | 99% turbidity removal with 4 g/L dose (pH 4)                                                                    | <sup>5</sup>  |
| Periwinkle shell                                               | Chitin and unidentified protein(s)            | 84% at 100 mg/L dose (pH 4)                                                                                     | <sup>6</sup>  |
| Snail shell                                                    | Cationic mineral surface                      | 60% green dye removal at 100 mg/L (pH 4)                                                                        | <sup>7</sup>  |
| Alginate                                                       | Calcium alginate gel formation                | 98% turbidity removal with 80 mg/L Ca <sup>2+</sup> and 0.02 mg/L alginate                                      | <sup>8</sup>  |
| <i>Achromobacter xylooxidans</i> strain TERI L1                | Exopolysaccharide production                  | 75% turbidity removal with 10% (v/v) dose                                                                       | <sup>9</sup>  |
| <i>Bacillus agaradhaerens</i> C9                               |                                               | 95% turbidity removal with 1.5 mg/L (pH 6.53)                                                                   | <sup>10</sup> |
| <i>Bacillus mucilaginosus</i> ,                                |                                               | 99% turbidity removal with 0.01% (v/v) dose                                                                     | <sup>11</sup> |
| <i>Chromobacterium violaceum</i> and <i>Citrobacter koseri</i> |                                               | 42% turbidity removal with 1% (v/v) dose (LT-6, pH 6) and 40% turbidity removal with 1% (v/v) dose (LT-5, pH 3) | <sup>12</sup> |
| <i>Bacillus licheniformis</i> strain W7                        | Glycoprotein with high polysaccharide content | 85% turbidity removal with 200 mg/L dose (pH 3)                                                                 | <sup>13</sup> |
| <i>Bacillus salmalaya</i>                                      | Protein-bound                                 | 83% turbidity with 2% dose                                                                                      | <sup>14</sup> |

|                                                   |                                            |                                                                                                |       |
|---------------------------------------------------|--------------------------------------------|------------------------------------------------------------------------------------------------|-------|
| 139SI-7                                           | polysaccharide                             | (pH 7)                                                                                         |       |
| <i>Bacillus velezensis</i>                        | Anionic polymer                            | 35% turbidity removal with 100 mg/L (pH 4 and 8)                                               | 15    |
| <i>Paenibacillus polymyxa</i>                     | Proteoglycan                               | 94% turbidity removal with 0.1% (v/v) dose                                                     | 16    |
| <i>Aspergillus niger</i>                          | Polysaccharide                             | 60% turbidity removal with 0.2% (v/v) dose                                                     | 17    |
| <i>Penicillium sp.</i> and <i>Trichoderma sp.</i> | Anionic fungi spores                       | 51% ( <i>Trichoderma</i> ) and 55% ( <i>Penicillium</i> ) turbidity removal with 1% (v/v) dose | 18    |
| <i>Abelmoschus esculentus</i>                     | Anionic polysaccharide                     | 97% turbidity removal with 3.2 mg/L (pH 6) and 88 mg/L Fe <sup>3+</sup>                        | 19    |
| Dragon fruit foliage                              | Not reported                               | 99.7% turbidity removal with 500 mg/L dose (pH 10)                                             | 20    |
| <i>Moringa oleifera</i>                           | Cationic proteins (MO2.1 and MoCBP)        | 99.7% turbidity removal with 25 mg/L dose (pH 7.16)                                            | 21-23 |
| <i>Ocimum basilicum</i> L.                        | Protonated groups on polysaccharide chains | 58.8% turbidity removal with <i>O. basilicum</i> and alum (pH 7)                               | 24    |
| Rice starch                                       | Polymers: amylase and amylopectin          | 84% TSS removal with 2 g/L dose (pH 3)                                                         | 25    |

**Table S6:** Final pH of water after being treated with various doses of cottonseed serum

| Volume serum added, mL | Average protein dose, mg/L | Final pH |
|------------------------|----------------------------|----------|
| 0                      | 0                          | 8.03     |
| 2                      | 0.766                      | 7.92     |
| 4                      | 1.533                      | 8.14     |
| 6                      | 2.299                      | 8.19     |
| 8                      | 3.065                      | 8.32     |
| 10                     | 3.831                      | 8.6      |



| Bio View:Identified Proteins                                                                                        | Accession Number | Alternate ID | Molecular Weight | 8527 |
|---------------------------------------------------------------------------------------------------------------------|------------------|--------------|------------------|------|
| uncharacterized protein LOC107929052 OS=Gossypium hirsutum OX=3635 GN=LOC107929052 PE=3 SV=1                        | A0A1U8LMX7       | LOC107929052 | 149 kDa          | 765  |
| vicilin GC72-A OS=Gossypium hirsutum OX=3635 GN=LOC107928550 PE=3 SV=1                                              | A0A1U8LQ34       | LOC107928550 | 72 kDa           | 543  |
| vicilin C72 OS=Gossypium hirsutum OX=3635 GN=LOC107928551 PE=3 SV=1                                                 | A0A1U8LLA0       | LOC107928551 | 70 kDa           | 343  |
| Lea4-A108 protein OS=Gossypium hirsutum OX=3635 GN=Lea4-D9 PE=2 SV=1                                                | Q53WZ7           | Lea4-D9      | 11 kDa           | 126  |
| P04264 SWISS-PROT:P04264 Tax_Id=9606 Gene_Symbol=KRT1 Keratin, type II cytoskeletal 1                               | P04264           |              | ?                | 97   |
| legumin B OS=Gossypium hirsutum OX=3635 GN=LOC107914926 PE=3 SV=1                                                   | A0A1U8KAE1       | LOC107914926 | 59 kDa           | 85   |
| sucrose-binding protein-like OS=Gossypium hirsutum OX=3635 GN=LOC107931543 PE=4 SV=1                                | A0A1U8LZX8       | LOC107931543 | 62 kDa           | 82   |
| sucrose-binding protein-like OS=Gossypium hirsutum OX=3635 GN=LOC107930549 PE=4 SV=1                                | A0A1U8LW A0      | LOC107930549 | 62 kDa           | 78   |
| P35908 SWISS-PROT:P35908 Tax_Id=9606 Gene_Symbol=KRT2 Keratin, type II cytoskeletal 2 epidermal                     | P35908           |              | ?                | 66   |
| Embryogenesis abundant protein OS=Gossypium hirsutum OX=3635 GN=Lea2A-A PE=2 SV=1                                   | Q03791           | Lea2A-A      | 12 kDa           | 65   |
| legumin A OS=Gossypium hirsutum OX=3635 GN=LOC107916455 PE=3 SV=1                                                   | A0A1U8KK K7      | LOC107916455 | 58 kDa           | 63   |
| P13645 SWISS-PROT:P13645 Tax_Id=9606 Gene_Symbol=KRT10 Keratin, type I cytoskeletal 10                              | P13645           |              | ?                | 58   |
| protein SLE1-like OS=Gossypium hirsutum OX=3635 GN=LOC107890949 PE=4 SV=1                                           | A0A1U8HY H9      | LOC107890949 | 12 kDa           | 53   |
| late embryogenesis abundant protein D-113-like OS=Gossypium hirsutum OX=3635 GN=LOC107891257 PE=3 SV=1              | A0A1U8I5J0       | LOC107891257 | 17 kDa           | 52   |
| glucose and ribitol dehydrogenase homolog 1-like isoform X1 OS=Gossypium hirsutum OX=3635 GN=LOC107894345 PE=4 SV=1 | A0A1U8IAI4       | LOC107894345 | 38 kDa           | 50   |
| Phosphoglycerate kinase OS=Gossypium hirsutum OX=3635 GN=LOC107922096 PE=3 SV=1                                     | A0A1U8L251       | LOC107922096 | 42 kDa           | 48   |
| glucose and ribitol dehydrogenase homolog 1-like OS=Gossypium hirsutum OX=3635 GN=LOC107899107 PE=4 SV=1            | A0A1U8IPZ7       | LOC107899107 | 38 kDa           | 46   |

**Table S7:** Liquid Chromatography-Mass Spectroscopy results of cottonseed serum

|                                                     |            |         |        |    |  |
|-----------------------------------------------------|------------|---------|--------|----|--|
| late embryogenesis abundant protein D-29-like       |            |         |        |    |  |
| OS=Gossypium hirsutum OX=3635 GN=LOC107951546       | A0A1U8NV   | LOC1079 |        |    |  |
| PE=4 SV=1                                           | X0         | 51546   | 35 kDa | 41 |  |
| P35527 SWISS-PROT:P35527 Tax_Id=9606                |            |         |        |    |  |
| Gene_Symbol=KRT9 Keratin, type I cytoskeletal 9     | P35527     |         | ?      | 37 |  |
| OS=Gossypium hirsutum OX=3635 GN=LOC107927644       |            |         |        |    |  |
| PE=3 SV=1                                           | A0A1U8LI10 | 27644   | 27 kDa | 37 |  |
| late embryogenesis abundant protein D-34-like       |            |         |        |    |  |
| OS=Gossypium hirsutum OX=3635 GN=LOC107942670       | A0A1U8MYI  | LOC1079 |        |    |  |
| PE=3 SV=1                                           | 9          | 42670   | 27 kDa | 37 |  |
| Phosphopyruvate hydratase OS=Gossypium hirsutum     |            |         |        |    |  |
| OX=3635 GN=LOC107905355 PE=3 SV=1                   | A0A1U8JAZ  | LOC1079 |        |    |  |
|                                                     | 9 (+1)     | 05355   | 48 kDa | 34 |  |
| uncharacterized protein ECU03_1610-like             |            |         |        |    |  |
| OS=Gossypium hirsutum OX=3635 GN=LOC107924971       | A0A1U8LCZ  | LOC1079 |        |    |  |
| PE=4 SV=1                                           | 0 (+1)     | 24971   | 26 kDa | 34 |  |
| Late embryogenesis abundant protein D-29            |            |         |        |    |  |
| OS=Gossypium hirsutum OX=3635 PE=3 SV=1             | P13940     |         | 33 kDa | 33 |  |
| alcohol dehydrogenase 1-like OS=Gossypium hirsutum  |            |         |        |    |  |
| OX=3635 GN=LOC107911678 PE=3 SV=1                   | A0A1U8JXP  | LOC1079 |        |    |  |
|                                                     | 4          | 11678   | 41 kDa | 32 |  |
| Peroxiredoxin OS=Gossypium hirsutum OX=3635         |            |         |        |    |  |
| GN=LOC107916248 PE=3 SV=1                           | A0A1U8KEE  | LOC1079 |        |    |  |
|                                                     | 0          | 16248   | 24 kDa | 31 |  |
| aldose reductase-like OS=Gossypium hirsutum OX=3635 |            |         |        |    |  |
| GN=LOC107959341 PE=3 SV=1                           | A0A1U8PI35 | LOC1079 |        |    |  |
|                                                     |            | 59341   | 36 kDa | 31 |  |
| late embryogenesis abundant protein D-34-like       |            |         |        |    |  |
| OS=Gossypium hirsutum OX=3635 GN=LOC107923257       | A0A1U8L2R  | LOC1079 |        |    |  |
| PE=3 SV=1                                           | 8          | 23257   | 26 kDa | 31 |  |
| leucine aminopeptidase 1-like OS=Gossypium hirsutum |            |         |        |    |  |
| OX=3635 GN=LOC107888423 PE=3 SV=1                   | A0A1U8HPR  | LOC1078 |        |    |  |
|                                                     | 0          | 88423   | 54 kDa | 28 |  |
| uncharacterized protein LOC107908186 OS=Gossypium   |            |         |        |    |  |
| hirsutum OX=3635 GN=LOC107908186 PE=3 SV=1          | A0A1U8JKV  | LOC1079 |        |    |  |
|                                                     | 7          | 08186   | 59 kDa | 28 |  |
| aldose reductase-like OS=Gossypium hirsutum OX=3635 |            |         |        |    |  |
| GN=LOC107940476 PE=4 SV=1                           | A0A1U8MU   | LOC1079 |        |    |  |
|                                                     | Z9         | 40476   | 36 kDa | 27 |  |
| serpin-ZX-like OS=Gossypium hirsutum OX=3635        |            |         |        |    |  |
| GN=LOC107940684 PE=3 SV=1                           | A0A1U8MV   | LOC1079 |        |    |  |
|                                                     | L0         | 40684   | 43 kDa | 27 |  |
| Malate dehydrogenase OS=Gossypium hirsutum          |            |         |        |    |  |
| OX=3635 GN=LOC107936241 PE=3 SV=1                   | A0A1U8MFT  | LOC1079 |        |    |  |
|                                                     | 2          | 36241   | 36 kDa | 26 |  |
| P13647 SWISS-PROT:P13647 Tax_Id=9606                |            |         |        |    |  |
| Gene_Symbol=KRT5 Keratin, type II cytoskeletal 5    | P13647     |         | ?      | 25 |  |
| late embryogenesis abundant protein D-7 isoform X2  |            |         |        |    |  |
| OS=Gossypium hirsutum OX=3635 GN=LOC107891681       | A0A1U8I8C9 | LOC1078 |        |    |  |
| PE=4 SV=1                                           | (+1)       | 91681   | 13 kDa | 24 |  |



|                                                                                                                    |                     |                  |        |    |
|--------------------------------------------------------------------------------------------------------------------|---------------------|------------------|--------|----|
| UTP--glucose-1-phosphate uridylyltransferase<br>OS=Gossypium hirsutum OX=3635 GN=LOC107895238<br>PE=3 SV=1         | A0A1U8II21<br>(+1)  | LOC1078<br>95238 | 49 kDa | 23 |
| Peptidyl-prolyl cis-trans isomerase OS=Gossypium<br>hirsutum OX=3635 GN=LOC107922329 PE=3 SV=1                     | A0A1U8KZH<br>3 (+1) | LOC1079<br>22329 | 18 kDa | 23 |
| em protein H5-like OS=Gossypium hirsutum OX=3635<br>GN=LOC107948294 PE=3 SV=1                                      | A0A1U8NG<br>V9      | LOC1079<br>48294 | 10 kDa | 22 |
| P08779 SWISS-PROT:P08779 Tax_Id=9606<br>Gene_Symbol=KRT16 Keratin, type I cytoskeletal 16                          | P08779              |                  | ?      | 22 |
| uncharacterized protein LOC107962160 OS=Gossypium<br>hirsutum OX=3635 GN=LOC107962160 PE=3 SV=1                    | A0A1U8PS0<br>7      | LOC1079<br>62160 | 28 kDa | 22 |
| Annexin OS=Gossypium hirsutum OX=3635 GN=Anx1<br>PE=2 SV=1                                                         | Q69DC2              | Anx1             | 36 kDa | 22 |
| probable aldo-keto reductase 1 OS=Gossypium hirsutum<br>OX=3635 GN=LOC107894809 PE=4 SV=1                          | A0A1U8IBN<br>4      | LOC1078<br>94809 | 38 kDa | 22 |
| heat shock 70 kDa protein OS=Gossypium hirsutum<br>OX=3635 GN=LOC107936049 PE=3 SV=1                               | A0A1U8MB<br>N0      | LOC1079<br>36049 | 71 kDa | 22 |
| vicilin-like seed storage protein At2g28490<br>OS=Gossypium hirsutum OX=3635 GN=LOC107953208<br>PE=4 SV=1          | A0A1U8NYI<br>4      | LOC1079<br>53208 | 55 kDa | 22 |
| uncharacterized protein LOC107938538 OS=Gossypium<br>hirsutum OX=3635 GN=LOC107938538 PE=3 SV=1                    | A0A1U8MN<br>N0      | LOC1079<br>38538 | 28 kDa | 21 |
| serpin-ZX-like OS=Gossypium hirsutum OX=3635<br>GN=LOC107887018 PE=3 SV=1                                          | A0A1U8HK<br>R0      | LOC1078<br>87018 | 43 kDa | 21 |
| probable aldo-keto reductase 1 OS=Gossypium hirsutum<br>OX=3635 GN=LOC107894822 PE=4 SV=1                          | A0A1U8IBN<br>7      | LOC1078<br>94822 | 37 kDa | 21 |
| Fructose-bisphosphate aldolase OS=Gossypium hirsutum<br>OX=3635 GN=LOC107899428 PE=3 SV=1                          | A0A1U8IW5<br>5 (+1) | LOC1078<br>99428 | 39 kDa | 21 |
| P02533 SWISS-PROT:P02533 Tax_Id=9606<br>Gene_Symbol=KRT14 Keratin, type I cytoskeletal 14                          | P02533              |                  | ?      | 20 |
| P48668 SWISS-PROT:P48668 Tax_Id=9606<br>Gene_Symbol=KRT6C Keratin, type II cytoskeletal 6C                         | P48668              |                  | ?      | 20 |
| embryonic protein DC-8-like OS=Gossypium hirsutum<br>OX=3635 GN=LOC107908729 PE=3 SV=1                             | A0A1U8JT74          | LOC1079<br>08729 | 63 kDa | 20 |
| seed biotin-containing protein SBP65-like isoform X1<br>OS=Gossypium hirsutum OX=3635 GN=LOC107924313<br>PE=4 SV=1 | A0A1U8L9Y<br>4      | LOC1079<br>24313 | 68 kDa | 20 |
| Glyceraldehyde-3-phosphate dehydrogenase<br>OS=Gossypium hirsutum OX=3635 GN=LOC107924606<br>PE=2 SV=1             | D2D308              | LOC1079<br>24606 | 37 kDa | 19 |

|                                                                                                                        |                    |                  |        |    |
|------------------------------------------------------------------------------------------------------------------------|--------------------|------------------|--------|----|
| Carbonic anhydrase OS=Gossypium hirsutum OX=3635<br>GN=LOC107909667 PE=3 SV=1                                          | A0A1U8JR79         | LOC1079<br>09667 | 28 kDa | 19 |
| 14-3-3 protein 6-like OS=Gossypium hirsutum OX=3635<br>GN=LOC107898790 PE=2 SV=1                                       | B6RF01             | LOC1078<br>98790 | 29 kDa | 19 |
| P00761 SWISS-PROT:P00761 TRYP_PIG Trypsin - Sus<br>scrofa (Pig).                                                       | P00761             | ?                |        | 18 |
| Glyceraldehyde-3-phosphate dehydrogenase<br>OS=Gossypium hirsutum OX=3635 GN=LOC107957019<br>PE=2 SV=1                 | D2D332             | LOC1079<br>57019 | 37 kDa | 18 |
| Peptidyl-prolyl cis-trans isomerase OS=Gossypium<br>hirsutum OX=3635 GN=LOC107945048 PE=3 SV=1                         | A0A1U8N91<br>0     | LOC1079<br>45048 | 18 kDa | 18 |
| basic 7S globulin-like OS=Gossypium hirsutum<br>OX=3635 GN=LOC107894474 PE=4 SV=1                                      | A0A1U8IAU<br>3     | LOC1078<br>94474 | 47 kDa | 18 |
| embryonic protein DC-8-like OS=Gossypium hirsutum<br>OX=3635 GN=LOC107889787 PE=3 SV=1                                 | A0A1U8HV0<br>5     | LOC1078<br>89787 | 63 kDa | 18 |
| vicilin-like seed storage protein At2g18540 isoform X1<br>OS=Gossypium hirsutum OX=3635 GN=LOC107896407<br>PE=4 SV=1   | A0A1U8IG12<br>(+1) | LOC1078<br>96407 | 77 kDa | 18 |
| Malate dehydrogenase OS=Gossypium hirsutum<br>OX=3635 GN=LOC107903665 PE=3 SV=1                                        | A0A1U8J4P3         | LOC1079<br>03665 | 35 kDa | 18 |
| uncharacterized protein LOC107905810 OS=Gossypium<br>hirsutum OX=3635 GN=LOC107905810 PE=4 SV=1                        | A0A1U8JCM<br>6     | LOC1079<br>05810 | 10 kDa | 18 |
| actin-7-like OS=Gossypium hirsutum OX=3635<br>GN=LOC107947058 PE=3 SV=1                                                | A0A1U8ND<br>N5     | LOC1079<br>47058 | 42 kDa | 18 |
| ruBisCO large subunit-binding protein subunit alpha-like<br>OS=Gossypium hirsutum OX=3635 GN=LOC107891664<br>PE=3 SV=1 | A0A1U8I8B4<br>(+2) | LOC1078<br>91664 | 62 kDa | 18 |



- Journal of Water Process Engineering* **10**, 172-187, doi:<https://doi.org/10.1016/j.jwpe.2015.09.010> (2016).
- 6 Menkiti, M. C., Ndaji, C. R., Ezemagu, I. G. & Uddameri, V. Application of Periwinkle Shell Coagulant (PSC) for the Remediation of Petroleum Produced Water (PPW) by Coag-Flocculation. *Journal of Dispersion Science and Technology* **37**, 760-774, doi:10.1080/01932691.2015.1060488 (2016).
- 7 Oladoja, N. A. & Aliu, Y. D. Snail shell as coagulant aid in the alum precipitation of malachite green from aqua system. *Journal of Hazardous Materials* **164**, 1496-1502, doi:<https://doi.org/10.1016/j.jhazmat.2008.09.114> (2009).
- 8 Devrimci, H. A., Yuksel, A. M. & Sanin, F. D. Algal alginate: A potential coagulant for drinking water treatment. *Desalination* **299**, 16-21, doi:<https://doi.org/10.1016/j.desal.2012.05.004> (2012).
- 9 Subudhi, S. *et al.* Purification and characterization of exopolysaccharide bioflocculant produced by heavy metal resistant *Achromobacter xylosoxidans*. *Carbohydrate Polymers* **137**, 441-451, doi:<https://doi.org/10.1016/j.carbpol.2015.10.066> (2016).
- 10 Liu, C., Wang, K., Jiang, J.-H., Liu, W.-J. & Wang, J.-Y. A novel bioflocculant produced by a salt-tolerant, alkaliphilic and biofilm-forming strain *Bacillus agaradhaerens* C9 and its application in harvesting *Chlorella minutissima* UTEX2341. *Biochemical Engineering Journal* **93**, 166-172, doi:<https://doi.org/10.1016/j.bej.2014.10.006> (2015).
- 11 Deng, S., Bai, R., Hu, X. & Luo, Q. Characteristics of a bioflocculant produced by *Bacillus mucilaginosus* and its use in starch wastewater treatment. *Applied Microbiology and Biotechnology* **60**, 588-593, doi:10.1007/s00253-002-1159-5 (2003).
- 12 Suryani, Ambarsari, L., Artika, I. M. & Susanti, H. E. Characterization of Bioflocculant Producing-Bacteria Isolated from Tapioca Waste Water. *HAYATI Journal of Biosciences* **18**, 193-196, doi:<https://doi.org/10.4308/hjb.18.4.193> (2011).
- 13 Okaiyeto, K., Nwodo, U. U., Mabinya, L. V., Okoli, A. S. & Okoh, A. I. Evaluation of flocculating performance of a thermostable bioflocculant produced by marine *Bacillus* sp. *Environmental Technology* **37**, 1829-1842, doi:10.1080/09593330.2015.1133717 (2016).
- 14 Abu Tawila, Z. M., Ismail, S., Dadrasnia, A. & Usman, M. M. Production and Characterization of a Bioflocculant Produced by *Bacillus salmalaya* 139SI-7 and Its Applications in Wastewater Treatment. *Molecules* **23**, 2689 (2018).
- 15 Hassimi, A. H., Ezril Hafiz, R., Muhamad, M. H. & Sheikh Abdullah, S. R. Bioflocculant production using palm oil mill and sago mill effluent as a fermentation feedstock: Characterization and mechanism of flocculation. *Journal of Environmental Management* **260**, 110046, doi:<https://doi.org/10.1016/j.jenvman.2019.110046> (2020).
- 16 Zhao, H. *et al.* Production of bioflocculants prepared from formaldehyde wastewater for the potential removal of arsenic. *Journal of Environmental Management* **172**, 71-76, doi:<https://doi.org/10.1016/j.jenvman.2016.02.024> (2016).
- 17 Pu, S. *et al.* Isolation, identification, and characterization of an *Aspergillus niger* bioflocculant-producing strain using potato starch wastewater as nutriline and its application. *PLOS ONE* **13**, e0190236, doi:10.1371/journal.pone.0190236 (2018).
- 18 Hassan, K. F. O., Saba Hussein Efficiency of fungi suspension spores as Biocoagulants for suspended solid sedimentation in wastewater. *International Journal of Scientific & Engineering Research* **7**, 578-585 (2016).
- 19 Freitas, T. K. F. S. *et al.* Optimization of coagulation-flocculation process for treatment of industrial textile wastewater using okra (*A. esculentus*) mucilage as natural coagulant. *Industrial Crops and Products* **76**, 538-544, doi:<https://doi.org/10.1016/j.indcrop.2015.06.027> (2015).

- 20 Idris, J. *et al.* Dragon fruit foliage plant-based coagulant for treatment of concentrated latex  
effluent: Comparison of treatment with ferric sulfate. *Journal of Chemistry* **2013** (2013).
- 21 Gassenschmidt, U., Jany, K. D., Bernhard, T. & Niebergall, H. Isolation and characterization of a  
flocculating protein from *Moringa oleifera* Lam. *Biochimica et Biophysica Acta (BBA) - General  
Subjects* **1243**, 477-481, doi:[https://doi.org/10.1016/0304-4165\(94\)00176-X](https://doi.org/10.1016/0304-4165(94)00176-X) (1995).
- 22 Freire, J. E. *et al.* Mo-CBP3, an antifungal chitin-binding protein from *Moringa oleifera* seeds, is a  
member of the 2S albumin family. *PLoS One* **10**, e0119871 (2015).
- 23 Nkurunziza, T., Nduwayezu, J., Banadda, E. & Nhapi, I. The effect of turbidity levels and *Moringa*  
*oleifera* concentration on the effectiveness of coagulation in water treatment. *Water Science  
and Technology* **59**, 1551-1558 (2009).
- 24 Rasool, M. A., Tavakoli, B., Chaibakhsh, N., Pendashteh, A. R. & Mirroshandel, A. S. Use of a  
plant-based coagulant in coagulation–ozonation combined treatment of leachate from a waste  
dumping site. *Ecological Engineering* **90**, 431-437,  
doi:<https://doi.org/10.1016/j.ecoleng.2016.01.057> (2016).
- 25 Teh, C. Y., Wu, T. Y. & Juan, J. C. Potential use of rice starch in coagulation–flocculation process  
of agro-industrial wastewater: Treatment performance and flocs characterization. *Ecological  
Engineering* **71**, 509-519, doi:<https://doi.org/10.1016/j.ecoleng.2014.07.005> (2014).
- 26 Needleman, S. B. & Wunsch, C. D. A general method applicable to the search for similarities in  
the amino acid sequence of two proteins. *Journal of Molecular Biology* **48**, 443-453,  
doi:[https://doi.org/10.1016/0022-2836\(70\)90057-4](https://doi.org/10.1016/0022-2836(70)90057-4) (1970).
- 27 Sievers, F. *et al.* Fast, scalable generation of high-quality protein multiple sequence alignments  
using Clustal Omega. *Mol Syst Biol* **7**, 539, doi:10.1038/msb.2011.75 (2011).
- 28 Pettersen, E. F. *et al.* UCSF Chimera—a visualization system for exploratory research and  
analysis. *Journal of computational chemistry* **25**, 1605-1612 (2004).
